# Supplementary material for: A Machine-Learning Approach for Dynamic Prediction of Sepsis-Induced Coagulopathy in Critically Ill Patients With Sepsis
Source: Front Med (Lausanne). 2021 Jan 21;7:637434. doi: 10.3389/fmed.2020.637434 (PMC7859637; doi:10.3389/fmed.2020.637434)
Supplement: Supplementary file 2 [file Data_Sheet_2.xlsx]

## Sheet: Sheet1
Variable	Importance (*10-3)	Full Model	Compact Model	EICU	Assessment method
Age	31.74	✓		✓	Hospital admission
Gender	2.42	✓		✓	Hospital admission
BMI	73.96	✓	✓	✓	Daily
Admission type	2.99	✓			Hospital admission
Ethnicity	2.96	✓		✓	Hospital admission
SAPS-II	42.77	✓			ICU admission
APACHE-IV				✓	ICU admission
Hypertension	3.06	✓			Hospital admission
DM	0.65	✓			Hospital admission
COPD	1.03	✓			Hospital admission
CHF	24.1	✓			Hospital admission
MI	4.5	✓			Hospital admission
CKD	8.78	✓			Hospital admission
Leukemia	0.03	✓			Hospital admission
Strokes	4.22	✓			Hospital admission
Cancer	8.85	✓			Hospital admission
Liver disease	4.05	✓			Hospital admission
GCS	15.04	✓		✓	Daily
Heart rate	96.41	✓	✓	✓	Daily
Respiratory rate	14.49	✓		✓	Daily
MAP	68.84	✓	✓	✓	Daily
SpO2	7.74	✓		✓	Daily
Temperature	24.99	✓		✓	Daily
Plateau pressure	6.67	✓		✓	Daily, if ventilated
Tidal volume	5.12	✓		✓	Daily, if ventilated
PEEP	13.59	✓		✓	Daily, if ventilated
RSBI	21.97	✓		✓	Daily, if ventilated
ROX index	8.63	✓		✓	Daily
Albumin	28.72	✓		✓	Daily
Total protein	0.92	✓		✓	Daily
Anion gap	51.85	✓		✓	Daily
BUN	41.75	✓		✓	Daily
Creatinine	139.05	✓	✓	✓	Daily
Globulin	0.21	✓			Daily
Fibrinogen	1.13	✓		✓	Daily
INR	144.33	✓	✓	✓	Daily
PT	172.75	✓	✓	✓	Daily
PTT	83.6	✓	✓	✓	Daily
MCH	9.61	✓		✓	Daily
MCHC	11.91	✓		✓	Daily
MCV	10.95	✓		✓	Daily
Platelet	407.38	✓	✓	✓	Daily
ALT	5.16	✓		✓	Daily
AST	22.79	✓		✓	Daily
ALP	10.89	✓			Daily
Total bilirubin	67.98	✓	✓	✓	Daily
Direct bilirubin	2.58	✓		✓	Daily
Indirect bilirubin	1.87	✓		✓	Daily
RBC	21.06	✓		✓	Daily
RDW	52.58	✓	✓	✓	Daily
WBC	58.91	✓	✓	✓	Daily
pH	5.88	✓		✓	Daily
PaO2	8.38	✓		✓	Daily
PaCO2	5.44	✓		✓	Daily
FiO2	9.26	✓		✓	Daily
PaO2/FiO2	8.09	✓		✓	Daily
SO2	6.27	✓			Daily
BE	11.56	✓		✓	Daily
Bicarbonate	61.09	✓	✓	✓	Daily
AADO2	13.01	✓			Daily
Total CO2	16.34	✓		✓	Daily
Hematocrit	12.36	✓		✓	Daily
Hemoglobin	15.15	✓		✓	Daily
Chloride	18.44	✓		✓	Daily
Calcium	27.61	✓		✓	Daily
Potassium	9.63	✓		✓	Daily
Sodium	4.42	✓		✓	Daily
Lactate	100.13	✓	✓	✓	Daily
Glucose	17.98	✓		✓	Daily
SpO2/FiO2	2.6	✓		✓	Daily
Urine output	182.46	✓	✓	✓	Sum of 24 hours
SIC platelet	134.98	✓		✓	Daily
SIC INR	38.59	✓		✓	Daily
Respiratory SOFA	5	✓		✓	Daily
Liver SOFA	12.2	✓		✓	Daily
Renal SOFA	55.9	✓		✓	Daily
Cardiovascular SOFA	104.5	✓		✓	Daily
SIC days	31.63	✓		✓	Before assessment
RBC Transfusion	7.61	✓		✓	Sum of 24 hours
FFP Transfusion	1.27	✓		✓	Sum of 24 hours
PLT Transfusion	0.99	✓		✓	Sum of 24 hours
Heparin use	1.93	✓		✓	Daily
Heparin days	12.29	✓		✓	Before assessment
Antibiotic types	38.15	✓			Daily
Linezolid	1.46	✓			Daily
Vancomycin	1.51	✓			Daily
CRRT use	0.21	✓			Daily
Vasopressor use	86.97	✓	✓	✓	Daily
MV durations	47.6	✓		✓	Before assessment
